# Supplementary material for: Gastric cancer burden, risk factors, and early detection strategies in Latin America and Colombia
Source: Research Square preprint supplement (doi:10.21203/rs.3.rs-8475256/v1), 2026-01-20
Supplement: Supplementary file 1 [file 780995ef5c0a335db9127021.xlsx]

## Sheet: Table 1
	Year	Indicator	National rate	Highest territorial entity (rate)	Second highest	Third highest
	2020	Incidence	(4.29)	Amazonas (10.29)	Quindío (9.31)	Huila (7.47)
		Prevalence	(20.25)	Amazonas (48.87)	Quindío (39.43)	Bogotá (32.50)
		Mortality	(4.61)	Amazonas (9.00)	Quindío (8.94)	Huila (6.66)
	2021	Incidence	(4.19)	Antioquia (6.86)	Bogotá (6.22)	Santander (5.87)
		Prevalence	(26.16)	Risaralda (62.02)	Norte de Santander (53.82)	Caldas (46.64)
		Mortality	(5.40)	Amazonas (10.62)	Huila (9.80)	Risaralda (9.16)
	2022	Incidence	(4.61)	Nariño (8.11)	Huila (7.51)	Quindío (7.47)
		Prevalence	(26.42)	Risaralda (62.05)	Norte de Santander (51.68)	Quindío (51.41)
		Mortality	(5.20)	Risaralda (8.98)	Quindío (8.54)	Huila (7.86)
	2023	Incidence	(4.73)	Quindío (10.36)	Risaralda (8.35)	Caquetá (8.06)
		Prevalence	(26.84)	Risaralda (60.82)	Quindío (56.27)	Caldas (45.83)
		Mortality	(5.33)	Risaralda (10.72)	Quindío (8.22)	Nariño (7.76)
	2024	Incidence	(4.33)	Nariño (8.88)	Risaralda (7.10)	Caquetá (7.06)
		Prevalence	(29.13)	Quindío (61.09)	Risaralda (59.55)	Caldas (46.24)
		Mortality	(5.66)	Risaralda (10.08)	Nariño (9.65)	Quindío (9.41)
	+Age-standardized rates per 100,000

## Sheet: Table 2
Table 2. Gastric cancer burden and risk-related characteristics among Latin American populations living outside the region
Aspect	Population / Setting	Main reported findings	Ref.
Population size	United States, Hispanic/Latino population	Approximately 68 million individuals in 2024, representing ~20% of the U.S. population	[18]
Incidence – men	Hispanic vs. non-Hispanic White men (2017–2021)	Incidence 11.4 vs. 7.1 per 100,000; RR 1.60	[19]
Incidence – women	Hispanic vs. non-Hispanic White women (2017–2021)	Incidence 8.0 vs. 3.5 per 100,000; RR 2.25	[19]
Mortality – men	Hispanic vs. non-Hispanic White men (2018–2022)	Mortality RR 2.04	[19]
Mortality – women	Hispanic vs. non-Hispanic White women (2018–2022)	Mortality RR 2.64	[19]
H. pylori seroprevalence	Latinos living in the United States	Overall seroprevalence ~57%; highest in Central Americans (72%) and South Americans (64%)	[20]
Age distribution	Hispanic adults in the U.S.	Highest seroprevalence in 35–44 and 45–54 age groups	[20]
Associated characteristics	Hispanic adults in the U.S.	Older age, male sex, lower education, non-U.S. born status, smoking, fewer medical visits	[20]
Region of origin	Immigrants from Latin America and other high-incidence regions	Elevated gastric cancer burden persists after migration to low-incidence countries	[21]
Acculturation	Hispanic populations in California	Higher non-cardia gastric adenocarcinoma in foreign-born, low-SES, less acculturated individuals	[22]
Dietary patterns	Hispanic immigrants and descendants	Changes in diet across generations associated with declining gastric cancer rates	[23–25]
Screening guidance	U.S. clinical guidance	Screening may be considered in first-generation immigrants ≥40 years from high-risk regions, including South America	[21]

## Sheet: Table 3
Table 3. Risk factors associated with gastric cancer in Latin America and Colombia: summary of reported evidence
Risk factor category	Specific factor	Population / Setting	Main reported results	Ref.
Helicobacter pylori infection	H. pylori prevalence	Latin America and the Caribbean	Overall prevalence 57.6% (95% CI: 50.4–64.7%); higher in adults (69.3%) than in children/adolescents (48.4%)	[10]
	H. pylori infection and histologic subtype	Latin America	Identified as the main risk factor for intestinal-type gastric cancer	[11]
	CagA-positive strains	Latin America	Higher gastric cancer risk compared with CagA-negative strains	[12]
	vacA s1/m1 genotypes	Latin America	Associated with increased risk of gastric cancer and peptic ulcer disease	[12,13]
	Geographic variability of vacA genotypes	South America	Significant inter-country variation in high-risk genotypes	[13]
Lifestyle habits and dietary factors	Tobacco smoking	Latin America	Increased gastric cancer risk (OR: 1.49; 95% CI: 1.29–1.73)	[14]
	Alcohol consumption	Latin America	Increased risk (OR: 1.45; 95% CI: 1.24–1.70)	[14]
	Chili pepper consumption	Latin America	Increased risk (OR: 1.94; 95% CI: 1.40–2.68)	[14]
	Processed or salted meat	Latin America	Increased risk (OR: 1.62; 95% CI: 1.25–2.10)	[14]
	High red meat intake	Latin America	Increased risk (OR: 1.47; 95% CI: 1.13–1.90)	[14]
	High salt intake	Latin America	Increased risk (OR: 1.98; 95% CI: 1.40–2.82)	[14]
	Fruit consumption	Latin America	Risk reduction of 39% (95% CI: 28–47%)	[14,15]
	Vegetable consumption	Latin America	Risk reduction of 53% (95% CI: 43–62%)	[14,15]
Genetic factors	H. pylori ancestral haplotypes	Nariño, Colombia	European ancestry strains predominant in high-risk areas; African ancestry strains predominant in low-risk areas	[16]
	Bacterial ancestry and histology	Colombia	European-origin strains associated with advanced histologic lesions and epithelial DNA damage	[16]
	Host genetic susceptibility (IL-1 gene cluster)	Latin America	IL-1 gene variants associated with increased gastric cancer risk	[17]

## Sheet: Table 4
	Strategy / Setting	Target population	Screening method	Main outcomes reported	Strengths	Limitations	Ref.
	Japan (national program)	General population	Radiography and/or upper endoscopy	Long-standing population-based screening associated with early-stage detection	Nationwide coverage; long-term experience	Radiation exposure; resource-intensive	[30,31]
	South Korea (NCSP)	Adults ≥40 years	Biennial radiography or upper endoscopy	47% reduction in gastric cancer mortality with endoscopic screening	Demonstrated mortality reduction; high participation	High costs; infrastructure-dependent	[32,33]
	Singapore and Taiwan	High-risk populations	Targeted endoscopic screening	Improved detection among high-risk individuals	Risk-based approach; cost-efficient	Not population-wide	[34]
	Chile (expert consensus)	Asymptomatic adults at standard risk	Risk-based prevention and prioritization of endoscopic evaluation	National recommendations for primary and secondary prevention of gastric cancer	Structured national guidance; adaptable to primary care	No nationwide population screening	[40]
	Chile (high-risk surveillance)	Individuals with premalignant gastric lesions	Risk-based endoscopic surveillance (OLGA/OLGIM-guided intervals)	Standardized surveillance of premalignant conditions	Focused use of endoscopy; evidence-based intervals	Resource-dependent; not population-wide	[41]
	Chile (opportunistic detection)	Symptomatic adults ≥40 years	Upper gastrointestinal endoscopy	Increased detection through symptom-based evaluation	Pragmatic; feasible within health system	Symptom-driven; late-stage risk	[42]
	Colombia (clinical practice guidelines)	Adults with suspected or early gastric cancer	Endoscopic diagnosis and early management pathways	Standardized approach for early detection and treatment	National guideline; evidence-based	No organized screening program	[43]
	Colombia (prevention and early diagnosis)	General population and risk groups	H. pylori diagnosis and eradication; early diagnostic algorithms	Emphasis on primary prevention and early diagnosis	Cost-effective; scalable	Implementation varies regionally	[44]
	Pepsinogen-based serology	Individuals at risk of premalignant lesions	Serum PGI, PGII, PGI/PGII ratio ± gastrin-17, H. pylori antibodies	Identification of atrophic gastritis	Non-invasive; low cost; scalable	Suboptimal sensitivity for population screening	[35–37]
	Volatile Organic Compounds (VOC) breath test (E-Nose)	High-risk and surveillance populations	Breath analysis using nanoarray technology	Sensitivity 90% and specificity 83% for severe GIM (OLGIM III–IV)	Non-invasive; rapid; high safety profile	Requires further validation; not yet standardized	[35,38,39]
	Risk stratification before endoscopy	Primary care population	Combined non-invasive testing	Improved selection of candidates for endoscopy	Cost-effective; reduces unnecessary procedures	Evidence still emerging	[35]
	Abbreviations: GC, gastric cancer; PGI, pepsinogen I; PGII, pepsinogen II; GIM, gastric intestinal metaplasia; OLGIM, Operative Link on Gastric Intestinal Metaplasia.
	Note: Reference numbers correspond to the bibliography cited in the main text. Note: In Latin America, no country has implemented nationwide population-based gastric cancer screening. Current strategies rely on risk-based prevention, opportunistic endoscopic detection, Helicobacter pylori eradication, and surveillance of premalignant gastric lesions.
